# Supplementary material for: Tailoring the structure and properties of epoxy–polyurea vitrimers via controllable network reconfiguration
Source: Royal Society of Chemistry journal article supplement (doi:10.1039/d0ta12173h), 2021-01-01
Supplement: d0ta12173h1.pdf [file d0ta12173h1.pdf]

# Tailoring the structure and property of epoxy-polyurea vitrimers via controllable network reconfiguration

Fance Ji<sup>b</sup>, Yiming Zhou<sup>\*, b</sup>, Yuming Yang<sup>\*, a</sup>

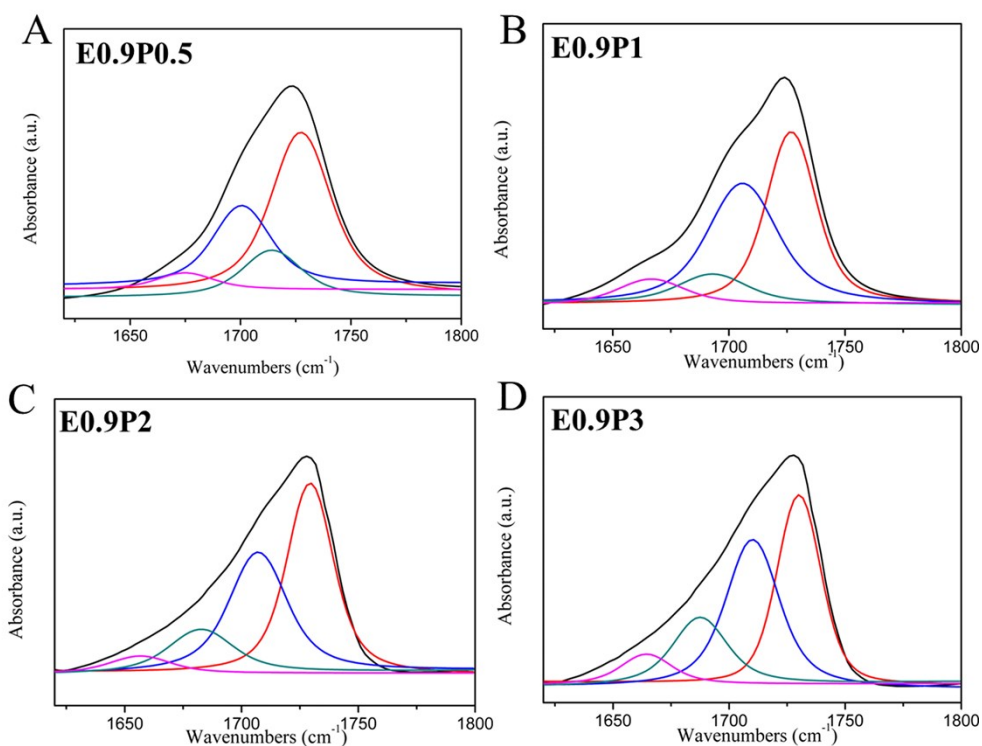

**Fig.S1** FT-IR spectrum curves for epoxy-polyurea vitrimers after the Gauss-Lorentz fitting

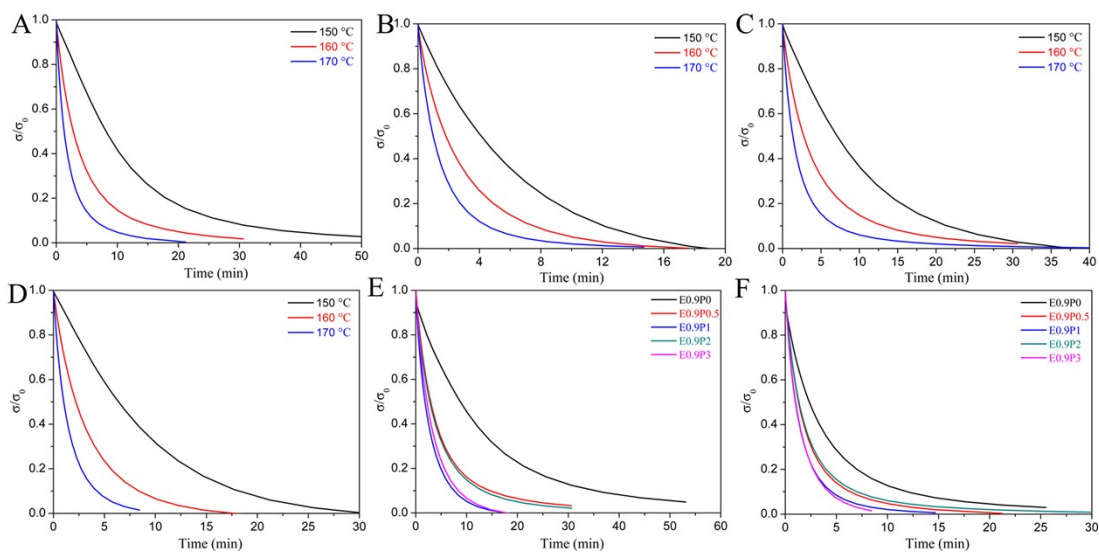

**Fig.S2** Stress relaxation curves of  $E_{0.9}P_{0.5}$ ,  $E_{0.9}P_1$ ,  $E_{0.9}P_2$ , and  $E_{0.9}P_3$  at different temperature (A-D). Comparison of the stress relaxation curves for epoxy-polyurea vitrimers with different compositions at 160 and 170 °C (E, F).

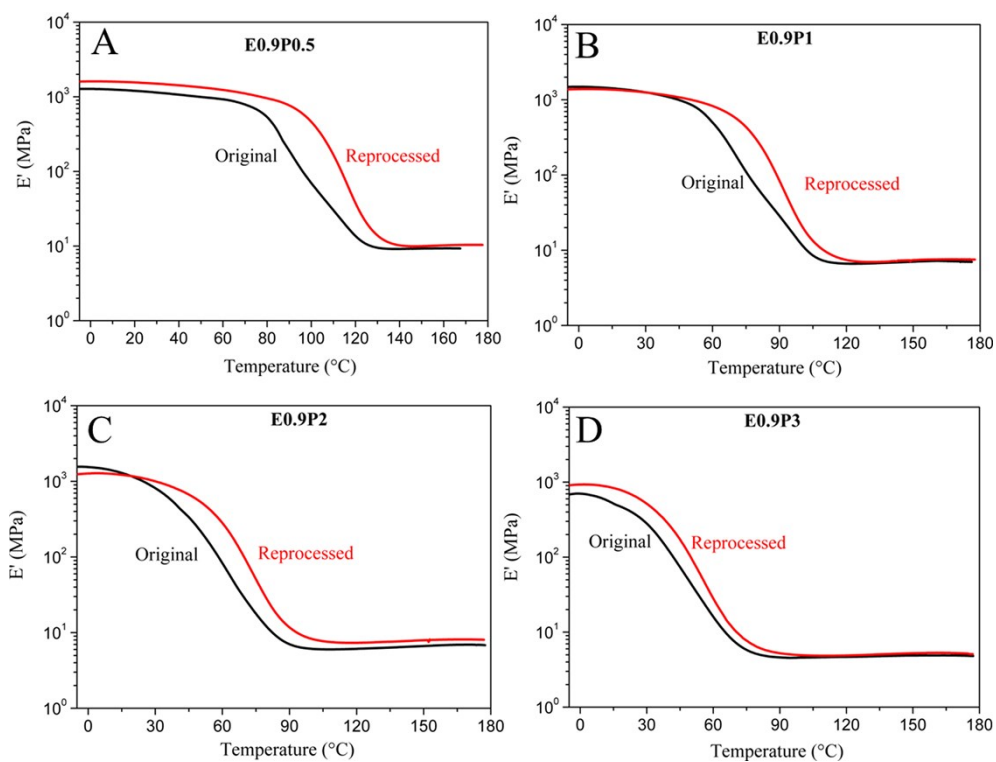

**Fig.S3** Storage modulus ( $E'$ ) versus temperature curves of epoxy-polyurea vitrimers before and after reprocessing.
